# Supplementary material for: Chronic alcohol-induced brain states limit propagation of direct cortical stimulation
Source: Research Square preprint supplement (doi:10.21203/rs.3.rs-6211912/v1), 2025-04-30
Supplement: Supplementary file 17 [file b7d292bb6cca07f3b91ebf3a.xlsx]

## Sheet: Control_prestim
vars	n	mean	sd	median	trimmed	mad	min	max	range	skew	kurtosis	se
LatP1	90	57.4779	6.07157	55.1667	57.0556	4.2007	40	70	30	0.430992	-0.295125	0.64
LatN1	90	95.4451	10.8546	93	94.4406	7.70952	76.3333	120	43.6667	0.828043	-0.172741	1.14418
LatP2	90	142.148	30.2206	131.333	139.542	31.6288	103	207.667	104.667	0.619252	-0.686979	3.18553
LatN2	90	164.777	36.8222	158.957	163.111	41.0828	110	248.333	138.333	0.309861	-0.592399	3.8814
LatP3	90	301.427	72.079	282.667	298.649	89.9444	189.667	448	258.333	0.187015	-0.865555	7.5978
AmplP1N1	90	31.2245	20.98	25.5554	29.2117	17.839	2.64979	78.2917	75.6419	0.76726	-0.449063	2.21148
AmplN1P2	90	18.184	19.5748	11.0317	13.072	5.52199	2.6288	85.2731	82.6443	2.3968	4.71904	2.06336
AmplP2N2	90	4.29719	4.24129	2.5	3.64551	2.52783	0	16.49	16.49	1.18868	0.295763	0.447072
AmplN2P3	90	20.7785	10.0783	17.4853	19.2444	6.20082	8.39497	56.8179	48.4229	1.35461	1.48516	1.06235
dB_deltaPower	90	22.6401	4.61823	21.8554	22.4727	4.25138	14.3278	32.89	18.5621	0.336531	-0.732086	0.486805
dB_thetaPower	90	24.0478	4.80183	22.9809	23.8346	4.95204	15.7168	33.9683	18.2515	0.357911	-0.736618	0.506157
dB_alphaPower	90	24.0523	4.90115	23.2401	23.8374	4.95604	15.3501	33.9352	18.5851	0.353964	-0.71725	0.516626
dB_betaPower	90	22.4438	5.59772	21.8302	22.3626	5.05788	11.4342	33.4807	22.0464	0.168054	-0.49494	0.590052
dB_gammaPower	90	10.8827	4.59997	11.0981	10.9763	5.37488	0.345026	19.0745	18.7294	-0.161066	-0.669938	0.48488
Time_deltaPower	90	131.081	131.958	104.358	106.548	30.0302	-12.9637	614.631	627.595	1.9117	3.58928	13.9096
Time_thetaPower	90	3.62663	0.883679	3.93677	3.9153	0	1.00708	3.93677	2.92969	-2.57017	4.73616	0.0931479
Time_alphaPower	90	123.651	118.994	86.3593	93.5005	23.6549	-11.6298	590.955	602.584	2.41153	4.8408	12.543
Time_betaPower	90	7.24653	0.955327	7.59888	7.43437	0.542944	4.02832	7.96509	3.93677	-1.60032	2.10367	0.1007
Time_gammaPower	90	124.108	128.647	81.4089	89.491	16.3154	35.7232	595.623	559.9	2.41404	4.56543	13.5606
Freq_deltaPower	90	122.472	131.312	77.6757	84.0832	8.30849	48.3952	611.63	563.235	2.61464	5.57307	13.8415
Freq_thetaPower	90	12.248	0.602677	12.085	12.0862	0	12.085	15.1062	3.02124	3.5979	11.5531	0.0635278
Freq_alphaPower	90	281.886	209.584	292.39	273.837	342.623	-14.6311	614.631	629.262	0.112741	-1.48852	22.0921
Freq_betaPower	90	31.7311	2.98018	30.0293	31.0681	0	30.0293	39.7339	9.70459	1.57655	0.927984	0.314139
Freq_gammaPower	90	120.86	119.428	81.4089	89.8585	16.8098	-11.6298	590.955	602.584	2.45415	4.95156	12.5888

## Sheet: Control_stim
vars	n	mean	sd	median	trimmed	mad	min	max	range	skew	kurtosis	se
LatP1	90	54.7876	2.40203	55	54.8827	1.48507	49	60	11	-0.406896	0.467518	0.253196
LatN1	90	87.181	8.08993	89.635	87.5874	5.00625	68.3333	118	49.6667	-0.0470129	1.46261	0.852754
LatP2	90	128.059	16.1406	127.64	127.467	9.84446	91.6667	168	76.3333	0.355482	1.37155	1.70136
LatN2	90	143.238	18.8695	141.48	141.853	10.1014	110	235	125	1.86972	7.73933	1.98902
LatP3	90	343.163	82.153	356.68	345.365	79.0517	184	479.667	295.667	-0.350359	-0.590064	8.65968
AmplP1N1	90	68.7956	23.8047	64.5003	65.6706	12.9402	24.8872	161.544	136.657	1.35827	2.26692	2.50923
AmplN1P2	90	34.6502	19.588	29.3465	32.2944	14.4407	2.70218	115.528	112.826	1.39358	2.57481	2.06476
AmplP2N2	90	6.4782	5.13593	6.0839	5.92122	5.82662	0.03	21.96	21.93	0.810314	0.363983	0.541374
AmplN2P3	90	33.8224	13.2387	31.167	32.752	6.77527	6.11994	68.4667	62.3468	0.865372	0.572449	1.39548
dB_deltaPower	90	28.7438	3.02368	28.7668	28.7004	2.43656	19.3066	37.4902	18.1836	-0.0739624	1.23886	0.318723
dB_thetaPower	90	30.6554	2.66789	30.6465	30.6948	1.56079	20.8281	38.4342	17.6061	-0.572056	2.66854	0.28122
dB_alphaPower	90	30.8418	2.61412	31.0776	30.8988	1.70399	21.4171	38.3043	16.8873	-0.639755	2.58238	0.275553
dB_betaPower	90	29.8497	2.72731	30.2199	30.0443	1.98675	18.5722	36.0296	17.4574	-1.14752	3.23217	0.287484
dB_gammaPower	90	16.6526	4.49357	15.73	15.9705	1.87359	4.15433	31.0107	26.8563	1.39154	2.72288	0.473664
Time_deltaPower	90	102.728	57.7032	102.084	98.5845	11.8657	24.7186	614.631	589.912	7.68848	65.8973	6.08245
Time_thetaPower	90	3.70993	0.73027	3.93677	3.91104	0	1.00708	3.93677	2.92969	-3.35787	9.51718	0.0769772
Time_alphaPower	90	86.1869	58.2677	75.4064	76.7588	7.29249	62.7345	540.6	477.866	6.52625	44.2316	6.14196
Time_betaPower	90	7.80565	0.332326	7.93442	7.88024	0.0454716	5.49316	7.96509	2.47192	-4.23611	24.1651	0.0350302
Time_gammaPower	90	79.6898	31.7901	76.8704	76.4029	4.75124	59.3997	368.529	309.129	8.3235	72.7412	3.35097
Freq_deltaPower	90	74.9559	6.80066	76.7403	75.3527	4.63011	59.3997	91.0796	31.6799	-0.59871	-0.274296	0.716852
Freq_thetaPower	90	12.3423	1.39234	12.085	12.085	0	12.085	21.4233	9.33838	5.70939	32.1269	0.146766
Freq_alphaPower	90	60.6096	27.1724	56.3985	57.1407	6.92168	31.0546	281.826	250.771	6.07692	46.1415	2.86423
Freq_betaPower	90	30.0952	0.522788	30.0293	30.0293	0	30.0293	34.9731	4.94385	9.02683	81.2183	0.0551066
Freq_gammaPower	90	80.2466	31.9147	77.3139	76.5011	5.30003	61.0671	368.529	307.461	8.19164	71.0034	3.3641

## Sheet: Alc_prestim
vars	n	mean	sd	median	trimmed	mad	min	max	range	skew	kurtosis	se
LatP1	90	54.361	5.60353	53.4386	54.6873	4.79082	22	66	44	-1.949	10.4425	0.590664
LatN1	90	78.5885	14.2655	74	76.3562	9.88894	63	142.67	79.67	1.95585	4.81198	1.50372
LatP2	90	116.501	40.5703	104.667	108.297	14.0847	70	232.33	162.33	1.68267	1.9958	4.27648
LatN2	90	165.925	64.877	140.667	155.893	36.0766	100	329.33	229.33	1.26517	0.109184	6.83864
LatP3	90	304.862	107.25	277.715	293.814	88.7808	134	575	441	0.957358	0.565941	11.3052
AmplP1N1	90	20.5629	12.3636	17.0723	19.1199	9.33297	4.26	55.2056	50.9456	0.945952	-0.0499421	1.30324
AmplN1P2	90	13.622	7.68468	12.8614	13.0913	6.29364	0.880186	40.7075	39.8273	0.709362	0.673241	0.810037
AmplP2N2	90	10.7696	7.97946	9.1067	9.79584	5.96999	0.06	41.41	41.35	1.26445	1.77705	0.841109
AmplN2P3	90	17.6594	12.8963	14.4426	15.8136	9.37983	0.914562	80.0451	79.1305	1.91592	5.46878	1.35938
dB_deltaPower	90	19.9018	4.70283	19.6215	19.8478	3.55366	8.90623	32.2322	23.3259	0.200611	-0.196698	0.495721
dB_thetaPower	90	20.9235	4.48617	20.4968	20.8633	3.76149	11.3922	32.6476	21.2554	0.228149	-0.353703	0.472884
dB_alphaPower	90	20.9279	4.39815	20.812	20.9073	3.56302	11.9486	32.0786	20.13	0.132024	-0.494526	0.463606
dB_betaPower	90	19.8472	4.19657	20.4428	19.9198	4.59459	11.6422	28.645	17.0028	-0.13962	-0.78349	0.442358
dB_gammaPower	90	14.3403	4.13916	15.3384	14.5407	3.8272	3.32833	21.7018	18.3735	-0.516689	-0.689118	0.436306
Time_deltaPower	90	178.104	115.466	145.962	157.185	74.4477	12.0467	524.594	512.547	1.61969	2.23416	12.1712
Time_thetaPower	90	3.88264	0.328854	3.93677	3.93677	0	1.00708	3.93677	2.92969	-7.71089	62.7548	0.0346643
Time_alphaPower	90	161.135	105.195	123.281	144.689	58.5871	31.0546	526.261	495.206	1.87466	3.77232	11.0885
Time_betaPower	90	6.94329	0.828053	6.83258	6.99937	0.89993	5.0354	7.96509	2.92969	-0.232577	-0.83933	0.0872844
Time_gammaPower	90	147.809	96.6186	122.426	135.559	70.1612	20.05	523.26	503.21	1.65409	3.5766	10.1845
Freq_deltaPower	90	86.6497	76.8695	67.4031	73.3897	27.667	26.386	579.95	553.564	4.04042	20.4584	8.10275
Freq_thetaPower	90	16.6022	5.35368	13.5416	15.9081	2.15956	12.085	28.7476	16.6626	0.761694	-0.957648	0.564327
Freq_alphaPower	90	116.863	156.733	56.3985	82.9449	12.8546	-14.6311	586.286	600.917	1.90987	2.10562	16.5211
Freq_betaPower	90	30.1932	0.6633	30.0293	30.0394	0	30.0293	34.8816	4.85229	5.41041	31.4008	0.0699179
Freq_gammaPower	90	130.016	92.9086	106.983	116.041	68.0748	26.386	516.924	490.538	1.97494	5.0656	9.79343

## Sheet: Alc_stim
vars	n	mean	sd	median	trimmed	mad	min	max	range	skew	kurtosis	se
LatP1	90	56.1689	6.73392	54.6667	54.5491	2.76258	51	79.3333	28.3333	2.61607	5.88576	0.709818
LatN1	90	79.4604	8.76371	75.1933	78.3533	4.24024	69	97.3333	28.3333	1.01473	-0.50451	0.923776
LatP2	90	106.005	7.51538	107.333	105.637	5.1891	90	140.667	50.6667	1.04223	3.98954	0.792191
LatN2	90	125.565	20.1786	116.667	122.225	9.884	105	180.667	75.6667	1.28514	0.531485	2.12701
LatP3	90	284.816	87.0246	291.633	286.159	110.404	130	441	311	-0.038364	-1.34354	9.17319
AmplP1N1	90	32.9569	25.4319	27.3044	29.4307	24.3643	5.41526	143.036	137.621	1.38086	2.60825	2.68075
AmplN1P2	90	14.8981	12.1298	12.0717	13.1103	10.068	0.919633	60.3362	59.4165	1.60543	2.96904	1.2786
AmplP2N2	90	5.70416	4.90118	4.8592	5.12547	5.0272	0.01	20.85	20.84	0.947642	0.558176	0.51663
AmplN2P3	90	27.1385	15.0578	24.1335	25.4926	11.0612	1.08176	85.1372	84.0555	1.19506	1.9591	1.58723
dB_deltaPower	90	22.2215	4.98474	21.6085	21.9473	4.32759	12.4903	36.2235	23.7333	0.505512	-0.0616161	0.525437
dB_thetaPower	90	23.4281	5.06182	22.524	23.2332	4.69026	13.6443	36.8248	23.1805	0.353819	-0.39902	0.533563
dB_alphaPower	90	23.3165	4.92122	22.2128	23.0496	4.91001	14.3894	36.4592	22.0698	0.455053	-0.533051	0.518742
dB_betaPower	90	21.4627	5.18254	21.0519	21.2368	5.99214	10.2331	35.1063	24.8732	0.349136	-0.656024	0.546288
dB_gammaPower	90	14.7268	6.23009	14.3249	14.625	7.33251	4.32543	28.7079	24.3825	0.0922424	-1.11668	0.656709
Time_deltaPower	90	136.883	78.9767	120.258	126.723	36.3388	-14.6311	362.193	376.824	1.16416	1.99968	8.32488
Time_thetaPower	90	3.86853	0.397251	3.93677	3.93616	0	1.00708	3.93677	2.92969	-6.3451	39.6679	0.041874
Time_alphaPower	90	139.317	75.5827	122.955	128.468	41.2458	-14.6311	371.863	386.494	1.29169	1.92515	7.96712
Time_betaPower	90	7.00491	0.767848	7.04956	7.06496	0.882285	4.85229	7.96509	3.11279	-0.600454	-0.0344145	0.0809383
Time_gammaPower	90	137.795	73.2864	128.927	123.509	59.8231	32.722	368.529	335.807	1.66578	2.37055	7.72507
Freq_deltaPower	90	144.28	120.62	86.411	118.892	39.99	46.7278	508.92	462.193	1.80055	2.36332	12.7144
Freq_thetaPower	90	13.4465	3.01471	12.085	12.6107	0	12.085	23.9868	11.9019	2.30038	4.15604	0.317778
Freq_alphaPower	90	123.168	133	64.0684	90.0566	14.3378	48.3952	578.283	529.887	2.27239	4.21993	14.0194
Freq_betaPower	90	31.6278	2.63322	30.0938	30.9758	0.0956939	30.0293	39.1846	9.15527	1.75094	1.90148	0.277566
Freq_gammaPower	90	134.336	76.5044	114.858	122.307	50.0833	-14.6311	371.863	386.494	1.39194	2.00518	8.06427
